# Supplementary material
Source: ML conference proceedings conference paper supplement (https://openaccess.thecvf.com/content/WACV_2020/html/Parsa_Spatio-Temporal_Pyramid_Graph_WACV_2020_paper.html)
Supplement: Supplementary file 1 [file Parsa_Spatio-Temporal_Pyramid_Graph_WACV_2020_supplemental.pdf]

Archive with 2 entries (2 files):
- 1026-supp.mp4
- 1026-supp.pdf
