# Supplementary material
Source: ML conference proceedings conference paper supplement (https://openaccess.thecvf.com/content/WACV_2020/html/Parsa_Spatio-Temporal_Pyramid_Graph_WACV_2020_paper.html)
Supplement: Supplementary file 1 [file Parsa_Spatio-Temporal_Pyramid_Graph_WACV_2020_supplemental.pdf › 1026-supp.pdf]

# Appendix Section

## 1. Additional Benchmarks

To better compare ST-PGN to ST-GCN we evaluated ST-PGN on additional datasets and modified its architecture to be more similar to the ST-GCN’s architecture. We increased the number of GCNs at each level of the pyramid and used TCN instead of LSTMs to create one feature for a sample clip in the benchmarks. So this version of our model predicts one label per video similar to ST-GCN. Hence these evaluations are to showcase that our models can also work on offline datasets with minor modifications. The benchmarks used for this evaluation are Skeleton-Kinetics [4] and NTU-RGBD [9] datasets as described in the following sections. Our models are comparable to the ST-GCN performance in offline setting, if not surpassing them. We conjecture that this could be more due to extremely diverse action labels (such as golfing or eating) that have distinct pose configurations. Since our models are designed to reduce confusion between similar pose configurations they do not seem to produce a huge benefit. We would like to investigate this further for our future work.

### 1.1. Kinetic Dataset

Deepmind Kinetics human action dataset [4] consists of 300,000 RGB video clips with an average duration of 10 seconds. These videos capture 400 human activities from sports to complex actions with interactions. For our experiments we need only the skeleton information of a video. [11] used OpenPose [1] toolbox and estimated 18 joints on every frame. The skeleton is represented by 18 nodes as shown in Figure 2.

### 1.2. NTU-RGBD Dataset

One of the widely used benchmarks for skeleton action recognition is NTU-RGBD, which contains 56,000 videos each containing a single action. This dataset has 60 classes of activities performed by 40 participants, and it includes both single-person and two-person activities. We use the dataset and the evaluation in the same way it is used in [11] to compare the results. The skeleton is represented by 25 nodes as shown in Figure 2.

### 1.3. Results

Table 1 and 2 show that our feature pyramid works similar to the ST-GCN, although it performs considerably better on UW-IOM and TUM dataset in an online scenario. However using GCN with edge importance along with LSTM does not perform well on UW-IOM and TUM datasets (Table 2 in the original paper). Therefore our conclusion is that the pyramidal architecture is effective in online settings where we want to solve an early action recognition task.

Moreover, in Skeleton-Kinetics and NTU-RGBD datasets, classes are more distinct comparing to UW-IOM and TUM and we see that pyramidal architecture’s contribution cannot add more information comparing to multiple GCNs in ST-GCN. The effect of the pyramid architecture is evident mostly when the classes are very similar and difficult to classify as well as in early action recognition tasks.

| Methods                    | Top-1         | Top-5  |
|----------------------------|---------------|--------|
| Deep LSTM [9]              | 16.4%         | 35.3%  |
| Temporal Conv [6]          | 20.3%         | 40.0%  |
| Uni-labeling [11]          | 19.3%         | 37.4%  |
| Distance partitioning [11] | 23.9%         | 44.9%  |
| Distance Partitioning [11] | 29.1%         | 51.3%  |
| Spatial Configuration [11] | 29.9%         | 52.2%  |
| ST-GCN + Imp. [11]         | 30.7%         | 52.8%  |
| ST-PGN with multiple GCN   | <b>32.13%</b> | 51.65% |

Table 1: Recognition performance in terms of top-1 classification accuracy on Kinetics dataset

| Methods                  | Cross Subject | Cross view |
|--------------------------|---------------|------------|
| Lie Group [10]           | 50.1%         | 52.8%      |
| H-RNN [2]                | 59.1%         | 64.0%      |
| Deep LSTM [9]            | 60.7%         | 67.3%      |
| PA-LSTM [9]              | 62.9%         | 70.3%      |
| ST-LSTM+TS [7]           | 69.2%         | 77.7%      |
| Temporal Conv [6]        | 74.3%         | 83.1%      |
| Visualize CNN [8]        | 76.0%         | 82.6%      |
| C-CNN+MTLN [5]           | 79.6%         | 84.8%      |
| ST-GCN + Imp [11]        | 81.5%         | 88.3%      |
| ST-PGN with multiple GCN | 79.24%        | 85.93%     |

Table 2: Recognition performance in terms of top- 1 classification accuracy on NTU dataset

## 2. Graph Adjacency Matrices

The size of the adjacency matrix that is applied on the input is  $15 \times 15$  for UW-IOM and TUM dataset and is  $25 \times 25$  and  $18 \times 18$  for Skeleton-Kinetic and NTU-RGBD dataset, respectively, depending on the size of the input skeleton. This adjacency matrix was decomposed to three matrices based on the spatial partitioning described in [11]. The GAP is then applied on these three matrices resulting into three matrices of size  $5 \times 5$  based on the grouping shown in Tables 4, 5 and 3. After a GCN layer aggregates the node features another GAP is applied and results in three  $3 \times 3$  matrices.

Note that in our final model we introduce edge importance weights on each component of the adjacency matrices. Edge importance matrices are randomly initialed using Xavier initialization and trained. Edge importance is multiplied to the features of the GCN layer.

## 3. Group average pool kernels

In Figure 2 we show the three skeleton used in this work and in Tables 4, 5 and 3 we report the nodes we used for the GAP in second and third level of the pyramid. After each GAP a GCN aggregates the features for each node. Successive such GAP layers help to reduce the dimensionality of the graph nodes sequentially and help in pooling semantics at multiple levels.

## 4. REBA calculation

We compute joint angles based on the 3D skeleton for every frame and we also use approximate objects weights in UW-IOM and TUM datasets. Therefore, given the prediction of our recognition model and joints angle, we can compute REBA by following the tables in [3]. In Figure 1 we describe the overall REBA calculation.

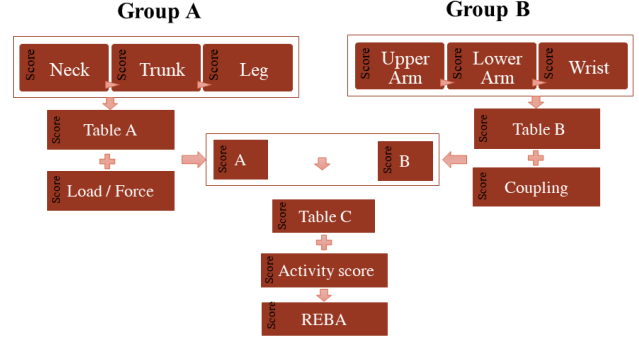

Figure 1: To compute REBA score, neck, trunk and legs (Group A), and upper/lower arm and wrist (Group B) are analyzed separately using Table A, and B described in [3]. The object load is considered in Table A and the handling of the object is considered in Table B. The sum of these scores along with the knowledge about the task (Table C) results in the final REBA score.

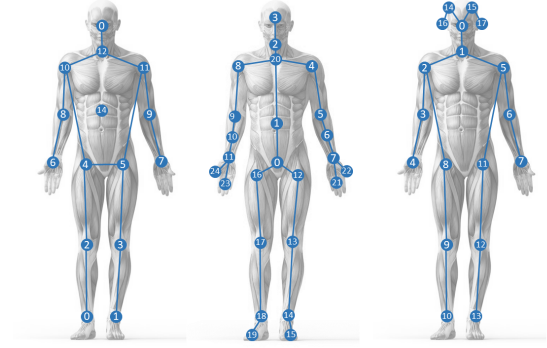

Figure 2: LCR-Net skeleton (UW-IOM and TUM datasets) on the left, Kinect-based skeleton (NTU-RGBD dataset) in the center, OpenPose-based skeleton (Skeleton-Kinetics, UW-IOM and TUM datasets) on the right. We use these pose configuration to create new Graphs and GAP kernels.

## 5. Confusion Matrix

Larger confusion matrices are showcased in the Figure 3. Here we also aim to compare the results with and without image fusion. A detailed explanation of the failure cases is explained in the main paper.

## 6. Video Results

In Figure 4 and Figure 5 we describe a few snapshots from the output of ST-PGN and ST-GCN models along with the Risk computation. The attached video showcases multiple examples from the test set.

| Pyramid level | Skeletal Node Groups |         |          |          |            |
|---------------|----------------------|---------|----------|----------|------------|
| First Level   | all 15 joints        |         |          |          |            |
| Second Level  | 0, 2, 4              | 1, 3, 5 | 6, 8, 10 | 7, 9, 11 | 12, 13, 14 |
| Third Level   | 0, 1                 | 2, 3    | 4        | -        | -          |

Table 3: The nodes involved in GAP for UW-IOM and TUM datasets with LCR-Net driven skeleton.

| Pyramid Level | Skeletal Node Groups |          |       |       |                 |
|---------------|----------------------|----------|-------|-------|-----------------|
| First Level   | all 18 joints        |          |       |       |                 |
| Second Level  | 8,9,10               | 11,12,13 | 2,3,4 | 5,6,7 | 0,1,14,15,16,17 |
| Third Level   | 0,1                  | 2,3      | 4     | -     | -               |

Table 4: The nodes involved in GAP for Skeleton-Kinetic dataset.

## References

- [1] Z. Cao, G. Hidalgo, T. Simon, S.-E. Wei, and Y. Sheikh. OpenPose: realtime multi-person 2D pose estimation using Part Affinity Fields. *arXiv preprint arXiv:1812.08008*, 2018.
- [2] Y. Du, W. Wang, and L. Wang. Hierarchical recurrent neural network for skeleton based action recognition. In *Proceedings of the IEEE conference on computer vision and pattern recognition*, pages 1110–1118, 2015.
- [3] S. Hignett and L. McAtamney. Rapid entire body assessment. In *Handbook of Human Factors and Ergonomics Methods*, pages 97–108. CRC Press, 2004.
- [4] W. Kay, J. Carreira, K. Simonyan, B. Zhang, C. Hillier, S. Vijayanarasimhan, F. Viola, T. Green, T. Back, P. Natsev, et al. The kinetics human action video dataset. *arXiv preprint arXiv:1705.06950*, 2017.
- [5] Q. Ke, M. Bennamoun, S. An, F. Sohel, and F. Boussaid. A new representation of skeleton sequences for 3d action recognition. In *Proceedings of the IEEE conference on computer vision and pattern recognition*, pages 3288–3297, 2017.
- [6] T. S. Kim and A. Reiter. Interpretable 3d human action analysis with temporal convolutional networks. In *2017 IEEE conference on computer vision and pattern recognition workshops (CVPRW)*, pages 1623–1631. IEEE, 2017.
- [7] J. Liu, A. Shahroudy, D. Xu, and G. Wang. Spatio-temporal lstm with trust gates for 3d human action recognition. In *European Conference on Computer Vision*, pages 816–833. Springer, 2016.
- [8] M. Liu, H. Liu, and C. Chen. Enhanced skeleton visualization for view invariant human action recognition. *Pattern Recognition*, 68:346–362, 2017.
- [9] A. Shahroudy, J. Liu, T.-T. Ng, and G. Wang. Ntu rgb+ d: A large scale dataset for 3d human activity analysis. In *Proceedings of the IEEE conference on computer vision and pattern recognition*, pages 1010–1019, 2016.
- [10] R. Vemulapalli, F. Arrate, and R. Chellappa. Human action recognition by representing 3d skeletons as points in a lie group. In *Proceedings of the IEEE conference on computer vision and pattern recognition*, pages 588–595, 2014.
- [11] S. Yan, Y. Xiong, and D. Lin. Spatial temporal graph convolutional networks for skeleton-based action recognition. In *Thirty-Second AAAI Conference on Artificial Intelligence*, 2018.

| Pyramid Level | Skeletal Node Groups |             |                 |               |     |        |
|---------------|----------------------|-------------|-----------------|---------------|-----|--------|
| First Level   | all 25 joints        |             |                 |               |     |        |
| Second Level  | 16,17,18,19          | 12,13,14,15 | 8,9,10,11,24,23 | 4,5,6,7,21,22 | 2,3 | 0,1,20 |
| Third Level   | 0,1                  | 2,3         | 4,5             | -             | -   | -      |

Table 5: The nodes involved in GAP for NTU-RGBD dataset.

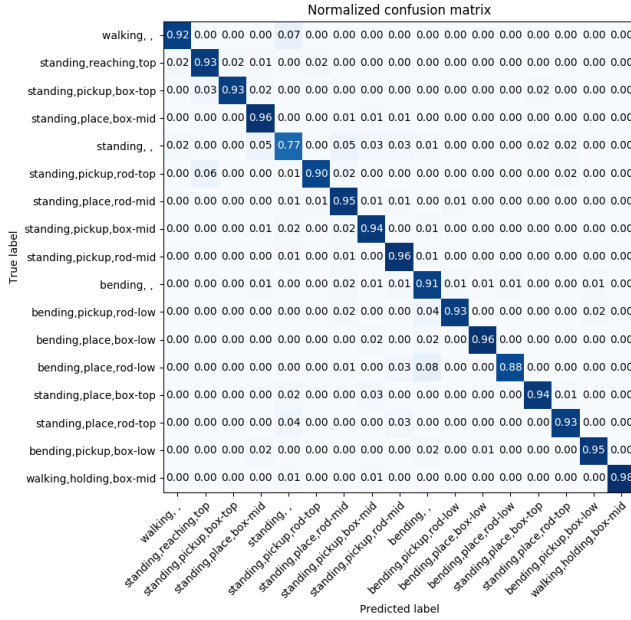

(a) UW-IOM : ST-PGN

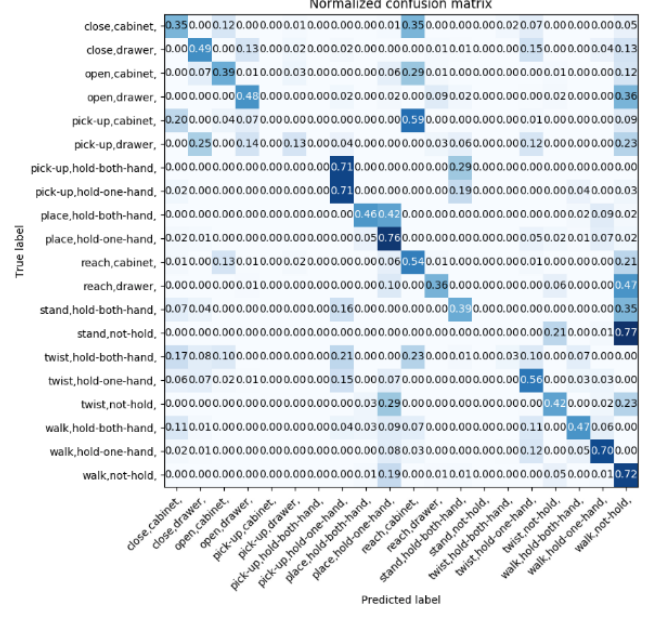

(b) TUM: ST-PGN

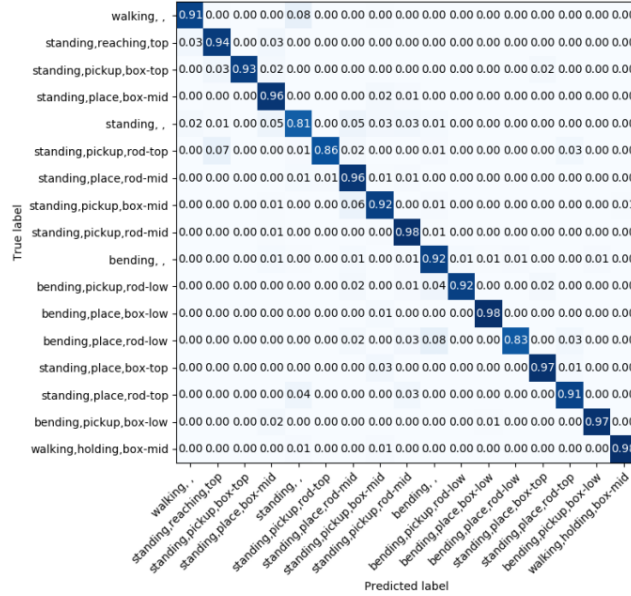

(c) UW-IOM : ST-PGN+ IMG Fusion

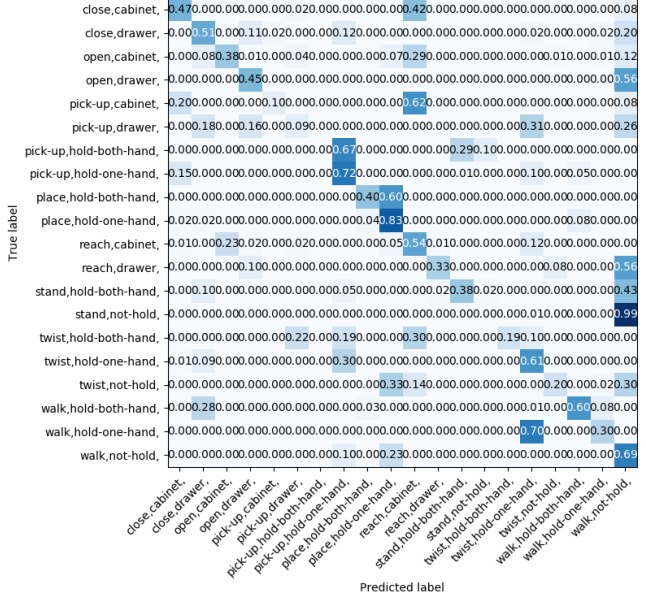

(d) TUM+IMG: ST-PGN+ IMG Fusion

Figure 3: Larger Confusion Matrix figures. Top row showcases the confusion matrices of the final ST-PGN model while the bottom row shows the results including optional fusion unit. As evidenced by our experiments, while image fusion helps to deal with object confusion (rod vs box), it does little to improve the results of the other classes significantly.

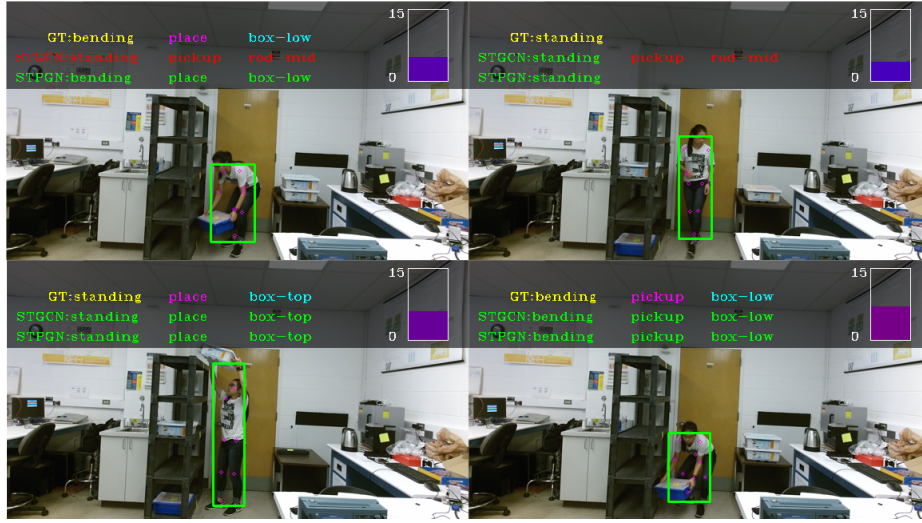

Figure 4: Sample Frames from UW-IOM video results. The Tank on the top-right of each image shows the REBA score and it is higher when the body deviates from its neutral posture (the bottom row). The labels from top to bottom are the ground truth labels, ST-GCN, and ST-PGN predictions, respectively. The top row examples showcase where ST-GCN fails to recognize the correct action, while our model works fine.

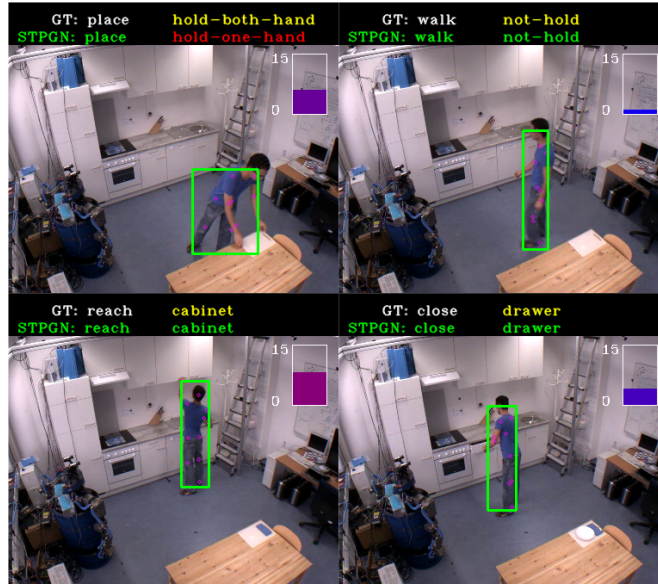

Figure 5: Sample Frames from TUM video results. The Tank on the top-right of each image shows the REBA score and it is higher when the body deviates from its neutral posture. In the top-right image we see REBA is low for a posture close to the neutral body posture. As the posture deviates for instance during bending (top-left) or reaching for an object above the head (bottom-left) the risk increases. Distinguishing between open-drawer and close-drawer is challenging, but our model can capture these two classes (bottom-right). In the image on top-left we see one common confusion between both-hand and one-hand manipulation.
